# Supplementary material for: Impact of clinical and sociodemographic factors on fatigue among patients with substance use disorder: a cohort study from Norway for the period 2016–2020
Source: Springer Nature journal article supplement (doi:10.1186/s13011-020-00334-x), 2020-12-01

**Additional File 4**

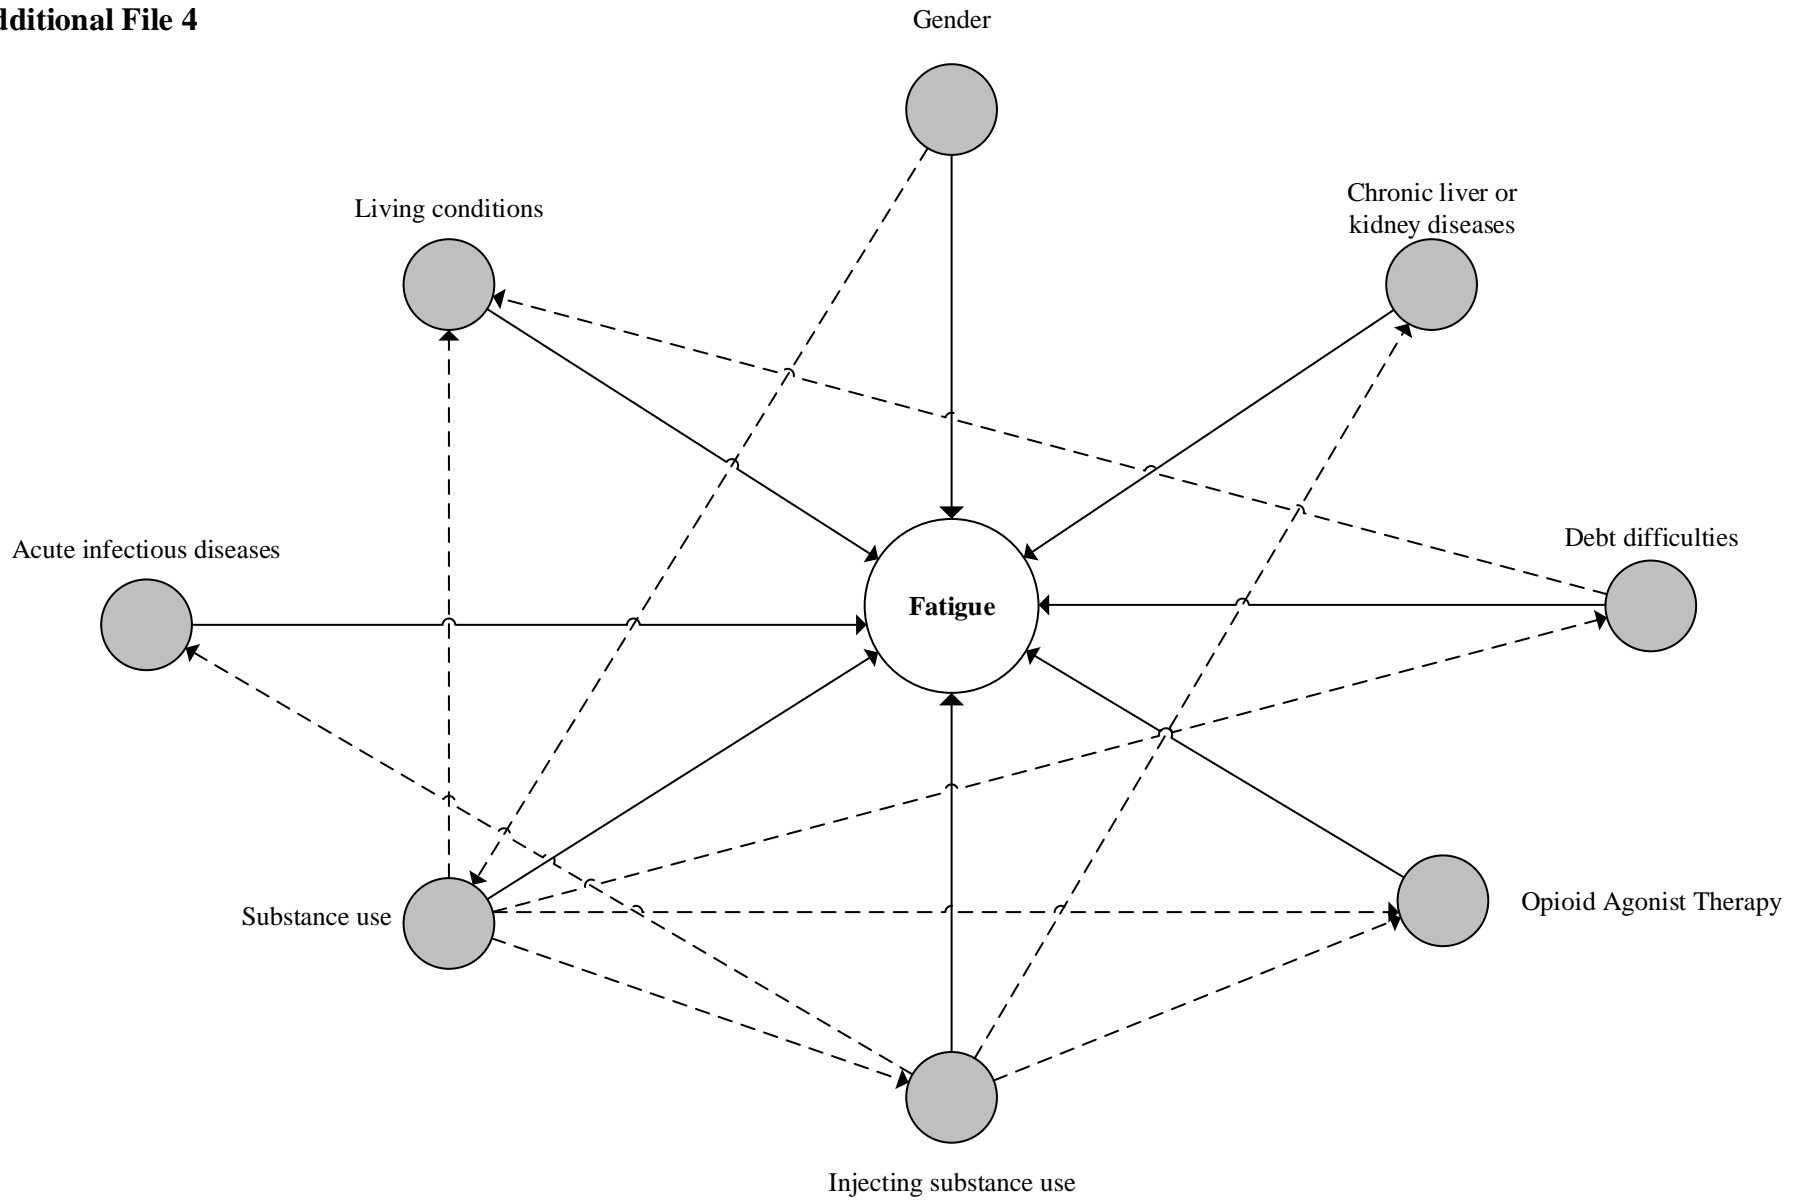

Supplement: MOESM4 [file 18681914]
